# Supplementary material for: Chimeric Antigen Receptor T Cell Therapy Targeting ICAM-1 in Gastric Cancer
Source: PubMed Central journal article supplement — Mol Ther Oncolytics. 2020 Aug 21;18:587–601. doi: 10.1016/j.omto.2020.08.009 (PMC7501410; doi:10.1016/j.omto.2020.08.009), 2020-08-21
Supplement: mmc1.pdf [file mmc1.pdf]

## **Supplemental Information**

### **Chimeric Antigen Receptor T Cell Therapy**

#### **Targeting ICAM-1 in Gastric Cancer**

**Minkyu Jung, Yanping Yang, Jaclyn E. McCloskey, Marjan Zaman, Yogindra Vedvyas, Xianglan Zhang, Dessislava Stefanova, Katherine D. Gray, Irene M. Min, Raza Zarnegar, Yoon Young Choi, Jae-Ho Cheong, Sung Hoon Noh, Sun Young Rha, Hyun Cheol Chung, and Moonsoo M. Jin**

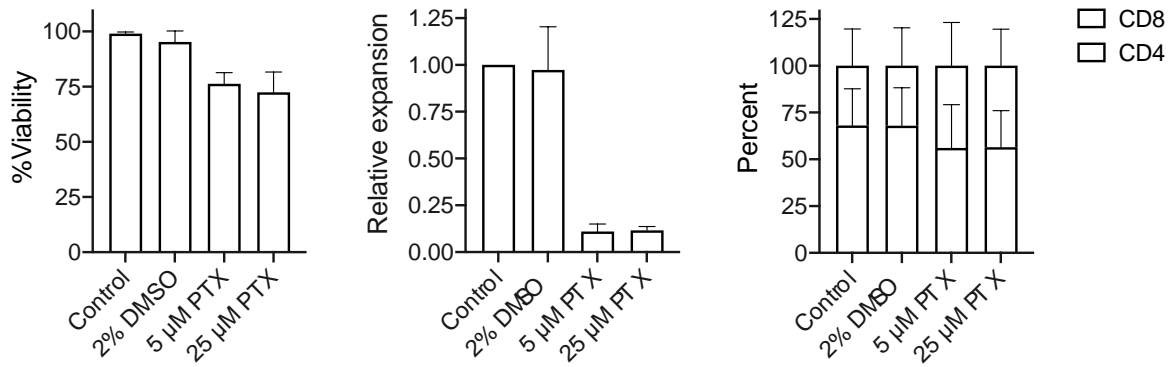

**Figure S1. The effect of paclitaxel on CAR T cell viability and expansion**

ICAM-1 CAR T cells were incubated with or without paclitaxel (5 or 25  $\mu$ M in 2% DMSO) in culture media. After 4 hours incubation, T cells were washed and resuspended in fresh culture media. At 72 hours after incubation with paclitaxel, the viability, cell number, and CD4/CD8 ratios of T cells were analyzed. Data represent mean  $\pm$  SD of three batches of CAR T cells (CP1, CP5, and CP8).

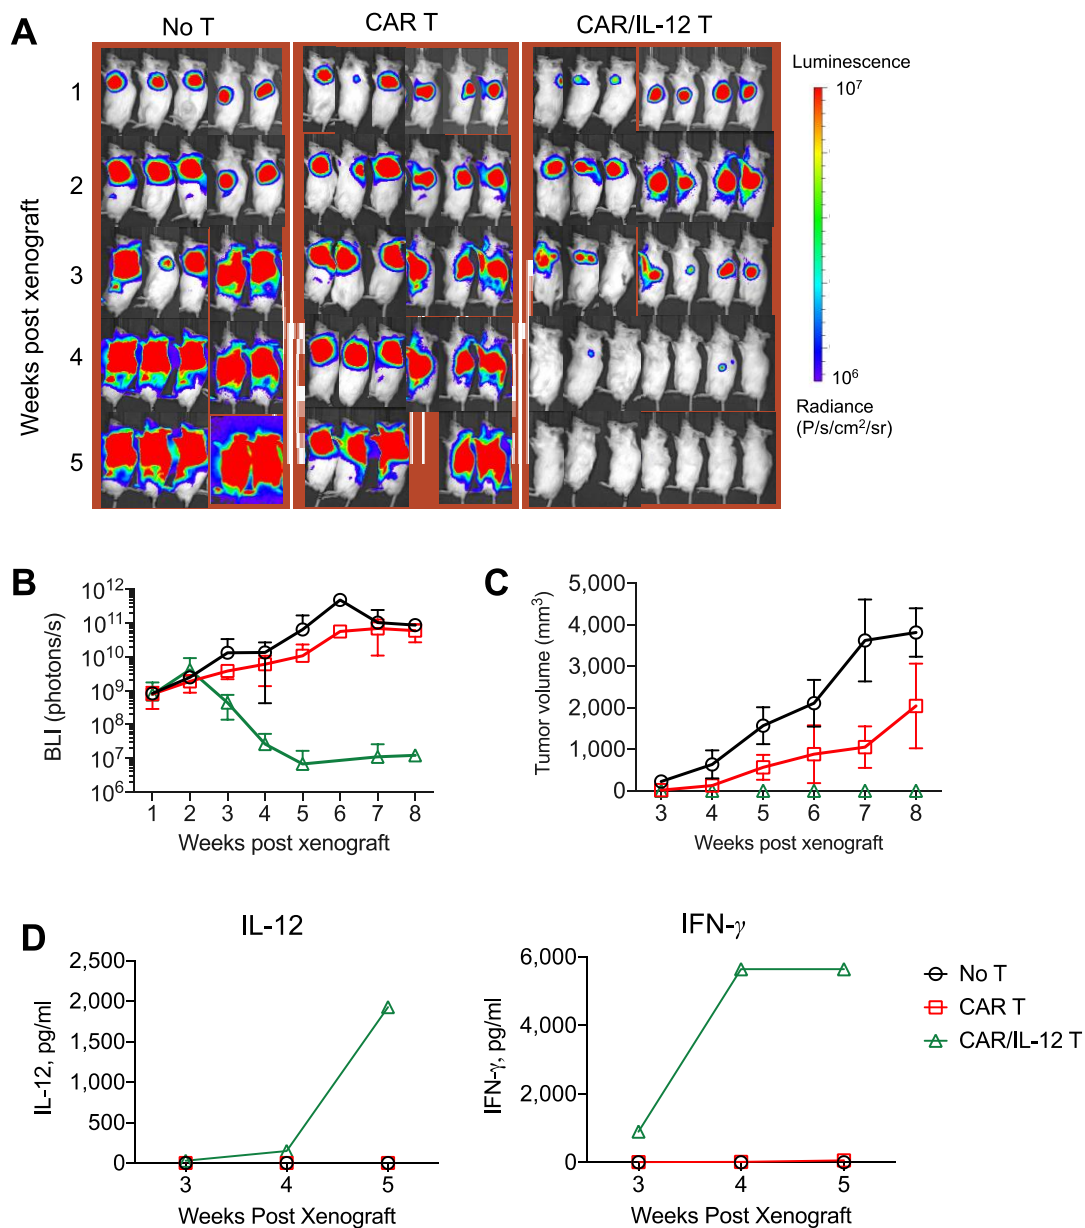

**Figure S2. Inducible IL-12 secretion enhances anti-tumor activity of CAR T cells against pre-established solid tumor**

NSG mice were subcutaneously implanted with  $1 \times 10^6$  GFP<sup>+</sup>FLuc<sup>+</sup> 8505C cells in the upper left flank. Five days after tumor inoculation, mice were either left untreated (no T) or treated with CAR T or CAR/IL-12 T cells ( $10 \times 10^6$  cells/mouse) via tail vein injection. (A) Whole-body bioluminescence imaging was used to evaluate tumor growth. (B) Quantitation of whole-body bioluminescence intensity. Results were pooled from two independent experiments using two different batches of CAR T cells, and donor-matched CAR/IL-12 T cells. Data represent mean  $\pm$  SD ( $n = 5-7$  mice per cohort). (C) Tumor volume measurements over time. Data are shown as mean  $\pm$  SD ( $n = 5-7$ ). (D) Serum IL-12 and IFN- $\gamma$  levels were measured from blood collected at 3, 4, and 5 weeks after tumor xenograft. IFN- $\gamma$  readouts of CAR/IL-12 T samples at 4 and 5 week timepoints were above the upper limit of detection.

**Table S1. Baseline characteristics of patients according to ICAM-1 expression**

| ICAM-1 intensity   | 0          | 1 (light brown) | 2 (brown) | 3 (dark brown) |
|--------------------|------------|-----------------|-----------|----------------|
| stage II (n = 54)  | 42 (77.8%) | 4 (7.4%)        | 5 (9.3%)  | 3 (5.6%)       |
| stage III (n = 80) | 41 (51.2%) | 17 (21.3%)      | 16 (20%)  | 6 (7.5%)       |

**Table S2. Summary of xenograft engraftments and time to death by intravenous and intraperitoneal injection of GC cell lines**

| Cell line | TCGA | Lauren     | ICAM-1           | i.v. injection <sup>a</sup>     |                      | i.p. injection <sup>b</sup> |                      |
|-----------|------|------------|------------------|---------------------------------|----------------------|-----------------------------|----------------------|
|           |      |            |                  | Engraftment pattern             | Time to death (days) | Engraftment pattern         | Time to death (days) |
| MKN-28    | CIN  | Intestinal | High             | Intrathoracic & Intraperitoneal | 90                   | Intraperitoneal             | 60                   |
| SNU-5     | CIN  | Diffuse    | Negative         | Intraperitoneal                 | 80                   | Intraperitoneal             | 70                   |
| SNU-719   | EBV  | Intestinal | Moderate         | Intrathoracic & Intraperitoneal | 90                   | Intraperitoneal             | 100                  |
| NCC-24    | EBV  | Diffuse    | Moderate         | Intraperitoneal                 | 100                  | Intraperitoneal             | 100                  |
| SNU-638   | MSI  | Intestinal | High             | Intraperitoneal                 | 70                   | Intraperitoneal             | 50                   |
| SNU-1     | MSI  | Diffuse    | Negative         | Intraperitoneal                 | 100                  | Intraperitoneal             | 100                  |
| HS746t    | GS   | Diffuse    | High             | Intrathoracic & Intraperitoneal | 50                   | Intraperitoneal             | 70                   |
| SNU-601   | GS   | Diffuse    | Moderate (Broad) | Intrathoracic & Intraperitoneal | 60                   | Intraperitoneal             | 100                  |

<sup>a</sup> $7.5 \times 10^5$  tumor cells injected intravenously; <sup>b</sup> $3 \times 10^6$  tumor cells injected intraperitoneally.

**Table S3. Summary of pre-infusion ICAM-1 CAR T cell characteristics**

| CAR T     | Donor no. | Methods      | CD4+ (%) | CD8+ (%) | c-Myc+/SSSTR2+ (%) |
|-----------|-----------|--------------|----------|----------|--------------------|
| CP1       | 1         | Prodigy      | 87       | 11       | 52                 |
| CP5       | 5         | Prodigy      | 65       | 34       | 45                 |
| CP9       | 9         | Prodigy      | 42       | 57       | 57                 |
| CAR/IL-12 | 9         | Rolling tube | 42       | 53       | 8                  |

**Table S4. Summary of post-infusion ICAM-1 CAR T cell characteristics**

| CAR T     | Tumor model <sup>a</sup> | Blood collection <sup>b</sup> | CD3+  | CD4:CD8 | c-Myc+ | T <sub>EM</sub> (CCR7 <sup>-</sup> /CD45RA <sup>-</sup> ) <sup>c</sup> |
|-----------|--------------------------|-------------------------------|-------|---------|--------|------------------------------------------------------------------------|
| CP9       | SNU-638, i.p.            | 8                             | 19.0% | 1:2.6   | ND     | ND                                                                     |
| CAR/IL-12 | SNU-638, i.p.            | 6                             | 79.4% | 1:2.0   | 13.3%  | 89.7%                                                                  |
| CAR/IL-12 | 8505C, s.c.              | 5                             | 83.2% | 1:1.2   | 11.2%  | 93.3%                                                                  |

<sup>a</sup>SNU-638, gastric cancer; 8505C, thyroid cancer; IP, intraperitoneal tumor model; s.c., subcutaneous tumor model.

<sup>b</sup>Weeks post xenograft. <sup>c</sup>Effector memory T cell population (T<sub>EM</sub>) were determined by anti-CCR7 and CD45RA antibody binding. ND, not determined.
